# Supplementary material
Source: publisher figshare collection journal article supplement (https://tandf.figshare.com/articles/dataset/_/7037696)
Supplement: Supplementary file 1 [file 1]

# Space-filling fractional factorial designs

## Supplementary Materials

### 1. Proof of Theorem 3

From equation (18), when  $s = 3$ , we have

$$\bar{\phi}(D) = 9^{-n} \sum_{i=0}^n (3 - \rho^2 - 2\rho)^i (3 + 2\rho^2 + 4\rho)^{n-i} A_i(D).$$

Using the formula

$$(a + b + c)^n = \sum_{k=0}^n \sum_{l=0}^k \binom{n}{k} \binom{k}{l} a^{n-k} b^{k-l} c^l,$$

we have

$$\begin{aligned} & \sum_{i=0}^n (3 - \rho^2 - 2\rho)^i (3 + 2\rho^2 + 4\rho)^{n-i} A_i(D) \\ &= \sum_{i=0}^n \left( \sum_{k_1=0}^i \sum_{l_1=0}^{k_1} \binom{i}{k_1} \binom{k_1}{l_1} 3^{i-k_1} (-\rho^2)^{k_1-l_1} (-2\rho)^{l_1} \right) \\ & \quad \left( \sum_{k_2=0}^{n-i} \sum_{l_2=0}^{k_2} \binom{n-i}{k_2} \binom{k_2}{l_2} 3^{n-i-k_2} (2\rho^2)^{k_2-l_2} (4\rho)^{l_2} \right) A_i(D) \\ &= \sum_{i=0}^n \left( \sum_{k_1=0}^i \sum_{k_2=0}^{n-i} \sum_{l_1=0}^{k_1} \sum_{l_2=0}^{k_2} \binom{i}{k_1} \binom{k_1}{l_1} \binom{n-i}{k_2} \binom{k_2}{l_2} (-1)^{k_1} 3^{n-k_1-k_2} 2^{k_2+l_1+l_2} \rho^{2k_1+2k_2-l_1-l_2} \right) A_i(D). \end{aligned}$$

Let  $2k_1 + 2k_2 - l_1 - l_2 = k$ . Comparing coefficient of  $\rho^k$  in equation (19), we have

$$\bar{B}_k(D) = \frac{N}{9^n} \sum_{i=0}^n \left( \sum_{\substack{2k_1+2k_2-l_1-l_2=k \\ 0 \leq l_1 \leq k_1 \leq i, \quad 0 \leq l_2 \leq k_2 \leq n-i}} \binom{i}{k_1} \binom{n-i}{k_2} \binom{k_1}{l_1} \binom{k_2}{l_2} (-1)^{k_1} 3^{n-k_1-k_2} 2^{k_2+l_1+l_2} \right) A_i(D).$$

Using the convention  $\binom{n}{x} = 0$  for  $x \leq 0$  or  $x > n$ , we can ignore the constraints  $0 \leq l_1 \leq k_1 \leq i$  and  $0 \leq l_2 \leq k_2 \leq n-i$  to simplify the notation.

Further let  $k_1 + k_2 - l_1 - l_2 = j$ , so  $k_1 + k_2 = k - j$  and  $l_1 + l_2 = k - 2j$ . Then we have

$$\begin{aligned} \bar{B}_k(D) &= \frac{N}{9^n} \sum_{i=0}^n \left( \sum_{j=0}^n \sum_{k_1+k_2=k-j} \sum_{l_1+l_2=k-2j} 3^{n+j-k} 2^{k-2j} (-1)^{k_1} 2^{k_2} \binom{i}{k_1} \binom{n-i}{k_2} \binom{k_1}{l_1} \binom{k_2}{l_2} \right) A_i(D) \\ &= \frac{2^k N}{3^{n+k}} \sum_{i=0}^n \left( \sum_{j=0}^n \sum_{k_1+k_2=k-j} \sum_{l_1+l_2=k-2j} \left( \frac{3}{4} \right)^j (-1)^{k_1} 2^{k_2} \binom{i}{k_1} \binom{n-i}{k_2} \binom{k_1}{l_1} \binom{k_2}{l_2} \right) A_i(D). \end{aligned}$$

Since  $\sum_{l_1+l_2=k-2j} \binom{k_1}{l_1} \binom{k_2}{l_2} = \binom{k_1+k_2}{k-2j} = \binom{k-j}{j}$ , we have

$$\bar{B}_k(D) = \frac{2^k N}{3^{n+k}} \sum_{i=0}^n \left( \sum_{j=0}^n \left( \frac{3}{4} \right)^j \binom{k-j}{j} \sum_{k_1+k_2=k-j} (-1)^{k_1} 2^{k_2} \binom{i}{k_1} \binom{n-i}{k_2} \right) A_i(D).$$

The definition of Krawtchouk polynomials implies  $\sum_{k_1+k_2=k-j} (-1)^{k_1} 2^{k_2} \binom{i}{k_1} \binom{n-i}{k_2} = P_{k-j}(i; n, 3)$ . Then

$$\bar{B}_k(D) = \frac{2^k N}{3^{n+k}} \sum_{i=0}^n \left( \sum_{j=0}^n \left( \frac{3}{4} \right)^j \binom{k-j}{j} P_{k-j}(i; n, 3) \right) A_i(D).$$

This completes the proof.

## 2. Some space-filling fractional factorial designs

**16-run four-level designs**

| <i>3 – factors</i> | <i>4 – factors</i> | <i>5 – factors</i> |
|--------------------|--------------------|--------------------|
| 1 1 1              | 1 1 1 0            | 1 1 1 1 1          |
| 1 3 2              | 1 3 2 1            | 1 3 2 3 3          |
| 1 2 0              | 1 2 0 2            | 1 2 0 2 2          |
| 1 0 3              | 1 0 3 3            | 1 0 3 0 0          |
| 3 3 3              | 3 3 3 2            | 3 3 3 2 1          |
| 3 1 0              | 3 1 0 3            | 3 1 0 0 3          |
| 3 0 2              | 3 0 2 0            | 3 0 2 1 2          |
| 3 2 1              | 3 2 1 1            | 3 2 1 3 0          |
| 2 2 2              | 2 2 2 3            | 2 2 2 0 1          |
| 2 0 1              | 2 0 1 2            | 2 0 1 2 3          |
| 2 1 3              | 2 1 3 1            | 2 1 3 3 2          |
| 2 3 0              | 2 3 0 0            | 2 3 0 1 0          |
| 0 0 0              | 0 0 0 1            | 0 0 0 3 1          |
| 0 2 3              | 0 2 3 0            | 0 2 3 1 3          |
| 0 3 1              | 0 3 1 3            | 0 3 1 0 2          |
| 0 1 2              | 0 1 2 2            | 0 1 2 2 0          |

**25-run five-level designs**

| <i>3 – factors</i> | <i>4 – factors</i> | <i>5 – factors</i> | <i>6 – factors</i> |
|--------------------|--------------------|--------------------|--------------------|
| 0 0 0              | 0 0 1 2            | 0 0 0 0 0          | 0 0 0 1 0 2        |
| 0 1 3              | 0 1 4 3            | 0 1 3 4 2          | 0 1 1 4 2 3        |
| 0 2 1              | 0 2 2 4            | 0 2 1 3 4          | 0 2 3 3 3 0        |
| 0 3 4              | 0 3 0 0            | 0 3 4 2 1          | 0 3 4 2 1 4        |
| 0 4 2              | 0 4 3 1            | 0 4 2 1 3          | 0 4 2 0 4 1        |
| 1 0 3              | 1 0 4 0            | 1 0 3 2 4          | 1 0 1 2 3 1        |
| 1 1 1              | 1 1 2 1            | 1 1 1 1 1          | 1 1 3 0 1 2        |
| 1 2 4              | 1 2 0 2            | 1 2 4 0 3          | 1 2 4 1 4 3        |
| 1 3 2              | 1 3 3 3            | 1 3 2 4 0          | 1 3 2 4 0 0        |
| 1 4 0              | 1 4 1 4            | 1 4 0 3 2          | 1 4 0 3 2 4        |
| 2 0 1              | 2 0 2 3            | 2 0 1 4 3          | 2 0 3 4 4 4        |
| 2 1 4              | 2 1 0 4            | 2 1 4 3 0          | 2 1 4 3 0 1        |
| 2 2 2              | 2 2 3 0            | 2 2 2 2 2          | 2 2 2 2 2 2        |
| 2 3 0              | 2 3 1 1            | 2 3 0 1 4          | 2 3 0 0 3 3        |
| 2 4 3              | 2 4 4 2            | 2 4 3 0 1          | 2 4 1 1 1 0        |
| 3 0 4              | 3 0 0 1            | 3 0 4 1 2          | 3 0 4 0 2 0        |
| 3 1 2              | 3 1 3 2            | 3 1 2 0 4          | 3 1 2 1 3 4        |
| 3 2 0              | 3 2 1 3            | 3 2 0 4 1          | 3 2 0 4 1 1        |
| 3 3 3              | 3 3 4 4            | 3 3 3 3 3          | 3 3 1 3 4 2        |
| 3 4 1              | 3 4 2 0            | 3 4 1 2 0          | 3 4 3 2 0 3        |
| 4 0 2              | 4 0 3 4            | 4 0 2 3 1          | 4 0 2 3 1 3        |
| 4 1 0              | 4 1 1 0            | 4 1 0 2 3          | 4 1 0 2 4 0        |
| 4 2 3              | 4 2 4 1            | 4 2 3 1 0          | 4 2 1 0 0 4        |
| 4 3 1              | 4 3 2 2            | 4 3 1 0 2          | 4 3 3 1 2 1        |
| 4 4 4              | 4 4 0 3            | 4 4 4 4 4          | 4 4 4 4 3 2        |

**32-run four-level designs**

| <i>3 – factors</i> | <i>4 – factors</i> | <i>5 – factors</i> | <i>6 – factors</i> |
|--------------------|--------------------|--------------------|--------------------|
| 1 1 1              | 1 1 1 0            | 1 1 1 1 0          | 1 1 1 0 1 1        |
| 1 2 0              | 1 0 2 2            | 1 2 2 3 0          | 1 3 2 1 1 2        |
| 1 3 1              | 1 2 1 3            | 1 3 1 2 1          | 1 0 1 2 0 2        |
| 1 0 0              | 1 3 2 1            | 1 0 2 0 1          | 1 2 2 3 0 1        |
| 1 1 3              | 1 1 0 2            | 1 1 0 3 3          | 1 1 0 1 2 3        |
| 1 2 2              | 1 0 3 0            | 1 2 3 1 3          | 1 3 3 0 2 0        |
| 1 3 3              | 1 2 0 1            | 1 3 0 0 2          | 1 0 0 3 3 0        |
| 1 0 2              | 1 3 3 3            | 1 0 3 2 2          | 1 2 3 2 3 3        |
| 3 2 2              | 3 0 3 1            | 3 2 3 0 2          | 3 3 3 3 3 2        |
| 3 1 3              | 3 1 0 3            | 3 1 0 2 2          | 3 1 0 2 3 1        |
| 3 0 2              | 3 3 3 2            | 3 0 3 3 3          | 3 2 3 1 2 1        |
| 3 3 3              | 3 2 0 0            | 3 3 0 1 3          | 3 0 0 0 2 2        |
| 3 2 0              | 3 0 2 3            | 3 2 2 2 1          | 3 3 2 2 0 0        |
| 3 1 1              | 3 1 1 1            | 3 1 1 0 1          | 3 1 1 3 0 3        |
| 3 0 0              | 3 3 2 0            | 3 0 2 1 0          | 3 2 2 0 1 3        |
| 3 3 1              | 3 2 1 2            | 3 3 1 3 0          | 3 0 1 1 1 0        |
| 2 3 0              | 2 2 2 3            | 0 3 2 2 3          | 2 0 2 2 2 3        |
| 2 0 1              | 2 3 1 1            | 0 0 1 0 3          | 2 2 1 3 2 0        |
| 2 1 0              | 2 1 2 0            | 0 1 2 1 2          | 2 1 2 0 3 0        |
| 2 2 1              | 2 0 1 2            | 0 2 1 3 2          | 2 3 1 1 3 3        |
| 2 3 2              | 2 2 3 1            | 0 3 3 0 0          | 2 0 3 3 1 1        |
| 2 0 3              | 2 3 0 3            | 0 0 0 2 0          | 2 2 0 2 1 2        |
| 2 1 2              | 2 1 3 2            | 0 1 3 3 1          | 2 1 3 1 0 2        |
| 2 2 3              | 2 0 0 0            | 0 2 0 1 1          | 2 3 0 0 0 1        |
| 0 0 3              | 0 3 0 2            | 2 0 0 3 1          | 0 2 0 1 0 0        |
| 0 3 2              | 0 2 3 0            | 2 3 3 1 1          | 0 0 3 0 0 3        |
| 0 2 3              | 0 0 0 1            | 2 2 0 0 0          | 0 3 0 3 1 3        |
| 0 1 2              | 0 1 3 3            | 2 1 3 2 0          | 0 1 3 2 1 0        |
| 0 0 1              | 0 3 1 0            | 2 0 1 1 2          | 0 2 1 0 3 2        |
| 0 3 0              | 0 2 2 2            | 2 3 2 3 2          | 0 0 2 1 3 1        |
| 0 2 1              | 0 0 1 3            | 2 2 1 2 3          | 0 3 1 2 2 1        |
| 0 1 0              | 0 1 2 1            | 2 1 2 0 3          | 0 1 2 3 2 2        |

**32-run four-level designs**

| 7 – factors |   |   |   |   |   |   | 8 – factors |   |   |   |   |   |   | 9 – factors |   |   |   |   |   |   |   |   |   |
|-------------|---|---|---|---|---|---|-------------|---|---|---|---|---|---|-------------|---|---|---|---|---|---|---|---|---|
| 0           | 1 | 1 | 1 | 1 | 1 | 1 | 1           | 1 | 1 | 1 | 1 | 0 | 0 | 1           | 0 | 0 | 3 | 0 | 0 | 3 | 2 | 0 | 1 |
| 0           | 2 | 3 | 0 | 1 | 2 | 3 | 1           | 3 | 2 | 0 | 1 | 2 | 3 | 0           | 0 | 1 | 0 | 3 | 0 | 1 | 0 | 1 | 0 |
| 0           | 3 | 1 | 3 | 0 | 2 | 0 | 1           | 2 | 1 | 2 | 0 | 2 | 1 | 3           | 0 | 2 | 3 | 2 | 3 | 1 | 1 | 3 | 3 |
| 0           | 0 | 3 | 2 | 0 | 1 | 2 | 1           | 0 | 2 | 3 | 0 | 0 | 2 | 2           | 0 | 3 | 0 | 1 | 3 | 3 | 3 | 2 | 2 |
| 0           | 1 | 0 | 0 | 3 | 3 | 2 | 1           | 1 | 0 | 0 | 2 | 3 | 2 | 3           | 0 | 0 | 2 | 3 | 2 | 0 | 3 | 3 | 1 |
| 0           | 2 | 2 | 1 | 3 | 0 | 0 | 1           | 3 | 3 | 1 | 2 | 1 | 1 | 2           | 0 | 1 | 1 | 0 | 2 | 2 | 1 | 2 | 0 |
| 0           | 3 | 0 | 2 | 2 | 0 | 3 | 1           | 2 | 0 | 3 | 3 | 1 | 3 | 1           | 0 | 2 | 2 | 1 | 1 | 2 | 0 | 0 | 3 |
| 0           | 0 | 2 | 3 | 2 | 3 | 1 | 1           | 0 | 3 | 2 | 3 | 3 | 0 | 0           | 0 | 3 | 1 | 2 | 1 | 0 | 2 | 1 | 2 |
| 3           | 2 | 2 | 2 | 2 | 2 | 2 | 3           | 3 | 3 | 3 | 3 | 2 | 2 | 3           | 3 | 1 | 1 | 1 | 1 | 1 | 3 | 3 | 1 |
| 3           | 1 | 0 | 3 | 2 | 1 | 0 | 3           | 1 | 0 | 2 | 3 | 0 | 1 | 2           | 3 | 0 | 2 | 2 | 1 | 3 | 1 | 2 | 0 |
| 3           | 0 | 2 | 0 | 3 | 1 | 3 | 3           | 0 | 3 | 0 | 2 | 0 | 3 | 1           | 3 | 3 | 1 | 3 | 2 | 3 | 0 | 0 | 3 |
| 3           | 3 | 0 | 1 | 3 | 2 | 1 | 3           | 2 | 0 | 1 | 2 | 2 | 0 | 0           | 3 | 2 | 2 | 0 | 2 | 1 | 2 | 1 | 2 |
| 3           | 2 | 3 | 3 | 0 | 0 | 1 | 3           | 3 | 2 | 2 | 0 | 1 | 0 | 1           | 3 | 1 | 0 | 2 | 3 | 2 | 2 | 0 | 1 |
| 3           | 1 | 1 | 2 | 0 | 3 | 3 | 3           | 1 | 1 | 3 | 0 | 3 | 3 | 0           | 3 | 0 | 3 | 1 | 3 | 0 | 0 | 1 | 0 |
| 3           | 0 | 3 | 1 | 1 | 3 | 0 | 3           | 0 | 2 | 1 | 1 | 3 | 1 | 3           | 3 | 3 | 0 | 0 | 0 | 0 | 1 | 3 | 3 |
| 3           | 3 | 1 | 0 | 1 | 0 | 2 | 3           | 2 | 1 | 0 | 1 | 1 | 2 | 2           | 3 | 2 | 3 | 3 | 0 | 2 | 3 | 2 | 2 |
| 2           | 3 | 3 | 3 | 3 | 3 | 3 | 2           | 2 | 2 | 2 | 2 | 3 | 3 | 2           | 2 | 2 | 0 | 2 | 2 | 0 | 0 | 2 | 1 |
| 2           | 0 | 1 | 2 | 3 | 0 | 1 | 2           | 0 | 1 | 3 | 2 | 1 | 0 | 3           | 2 | 3 | 3 | 1 | 2 | 2 | 2 | 3 | 0 |
| 2           | 1 | 3 | 1 | 2 | 0 | 2 | 2           | 1 | 2 | 1 | 3 | 1 | 2 | 0           | 2 | 0 | 0 | 0 | 1 | 2 | 3 | 1 | 3 |
| 2           | 2 | 1 | 0 | 2 | 3 | 0 | 2           | 3 | 1 | 0 | 3 | 3 | 1 | 1           | 2 | 1 | 3 | 3 | 1 | 0 | 1 | 0 | 2 |
| 2           | 3 | 2 | 2 | 1 | 1 | 0 | 2           | 2 | 3 | 3 | 1 | 0 | 1 | 0           | 2 | 2 | 1 | 1 | 0 | 3 | 1 | 1 | 1 |
| 2           | 0 | 0 | 3 | 1 | 2 | 2 | 2           | 0 | 0 | 2 | 1 | 2 | 2 | 1           | 2 | 3 | 2 | 2 | 0 | 1 | 3 | 0 | 0 |
| 2           | 1 | 2 | 0 | 0 | 2 | 1 | 2           | 1 | 3 | 0 | 0 | 2 | 0 | 2           | 2 | 0 | 1 | 3 | 3 | 1 | 2 | 2 | 3 |
| 2           | 2 | 0 | 1 | 0 | 1 | 3 | 2           | 3 | 0 | 1 | 0 | 0 | 3 | 3           | 2 | 1 | 2 | 0 | 3 | 3 | 0 | 3 | 2 |
| 1           | 0 | 0 | 0 | 0 | 0 | 0 | 0           | 0 | 0 | 0 | 0 | 1 | 1 | 0           | 1 | 3 | 2 | 3 | 3 | 2 | 1 | 1 | 1 |
| 1           | 3 | 2 | 1 | 0 | 3 | 2 | 0           | 2 | 3 | 1 | 0 | 3 | 2 | 1           | 1 | 2 | 1 | 0 | 3 | 0 | 3 | 0 | 0 |
| 1           | 2 | 0 | 2 | 1 | 3 | 1 | 0           | 3 | 0 | 3 | 1 | 3 | 0 | 2           | 1 | 1 | 2 | 1 | 0 | 0 | 2 | 2 | 3 |
| 1           | 1 | 2 | 3 | 1 | 0 | 3 | 0           | 1 | 3 | 2 | 1 | 1 | 3 | 3           | 1 | 0 | 1 | 2 | 0 | 2 | 0 | 3 | 2 |
| 1           | 0 | 1 | 1 | 2 | 2 | 3 | 0           | 0 | 1 | 1 | 3 | 2 | 3 | 2           | 1 | 3 | 3 | 0 | 1 | 1 | 0 | 2 | 1 |
| 1           | 3 | 3 | 0 | 2 | 1 | 1 | 0           | 2 | 2 | 0 | 3 | 0 | 0 | 3           | 1 | 2 | 0 | 3 | 1 | 3 | 2 | 3 | 0 |
| 1           | 2 | 1 | 3 | 3 | 1 | 2 | 0           | 3 | 1 | 2 | 2 | 0 | 2 | 0           | 1 | 1 | 3 | 2 | 2 | 3 | 3 | 1 | 3 |
| 1           | 1 | 3 | 2 | 3 | 2 | 0 | 0           | 1 | 2 | 3 | 2 | 2 | 1 | 1           | 1 | 0 | 0 | 1 | 2 | 1 | 1 | 0 | 2 |
